# Supplementary material for: Effects of solvents and temperature on the luminescence properties of Cd-isonicotinic acid frameworks based on mono-, bi-, and trinuclear cluster units
Source: Royal Society of Chemistry journal article supplement (doi:10.1039/c3ce42216j), 2013-11-22
Supplement: c3ce42216j.pdf [file c3ce42216j.pdf]

## Supporting Information

### Effects of Solvents and Temperature on the Fluorescence Properties of Cd-Isonicotinic Acid Frameworks Based on Mono-, Bi-, and Trinuclear Cluster Units

Song Gao,<sup>†</sup> Rui-Qing Fan,<sup>\*,†</sup> Liang-Sheng Qiang,<sup>†</sup> Ping Wang,<sup>†</sup> Shuo Chen,<sup>†</sup>  
Xin-Ming Wang,<sup>†</sup> Yu-Lin Yang<sup>\*,†</sup>

<sup>†</sup>Department of Chemistry, Harbin Institute of Technology, Harbin 150001, P. R. of China

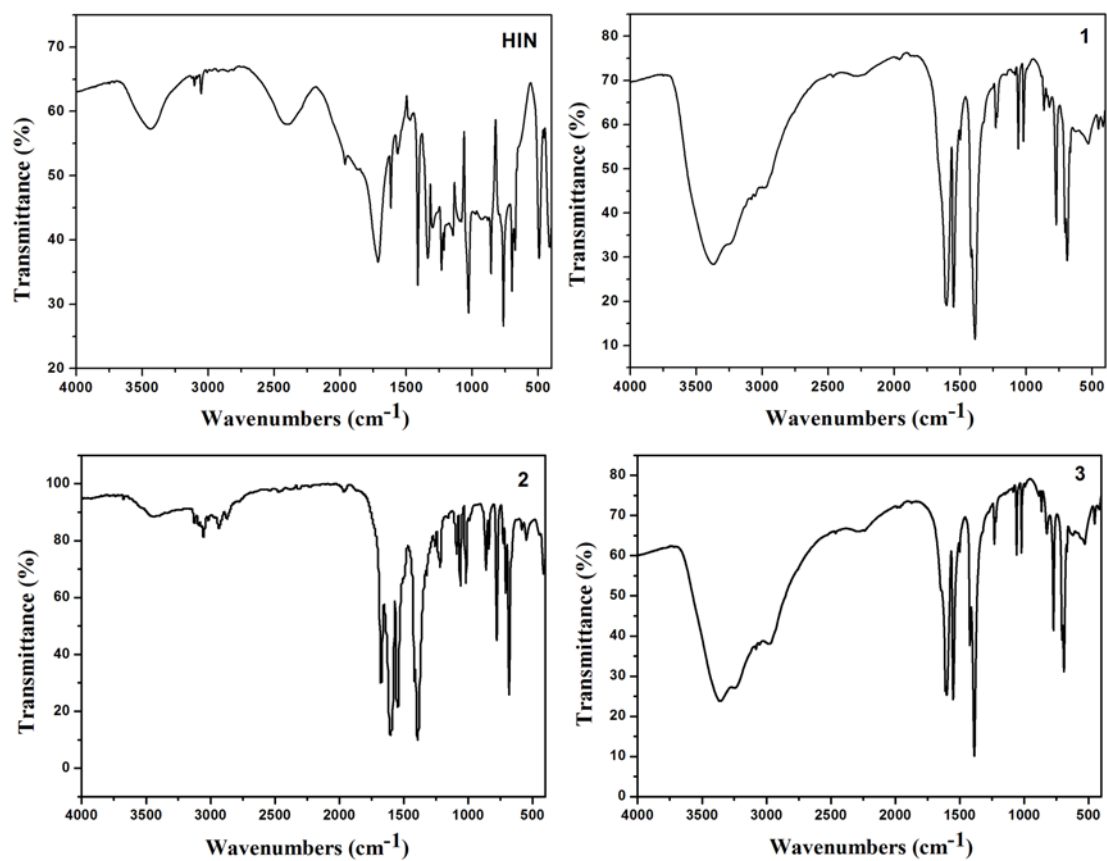

**Figure S1.** Infrared spectra of coordination polymers **1–3** and HIN recorded from a KBr pellet.

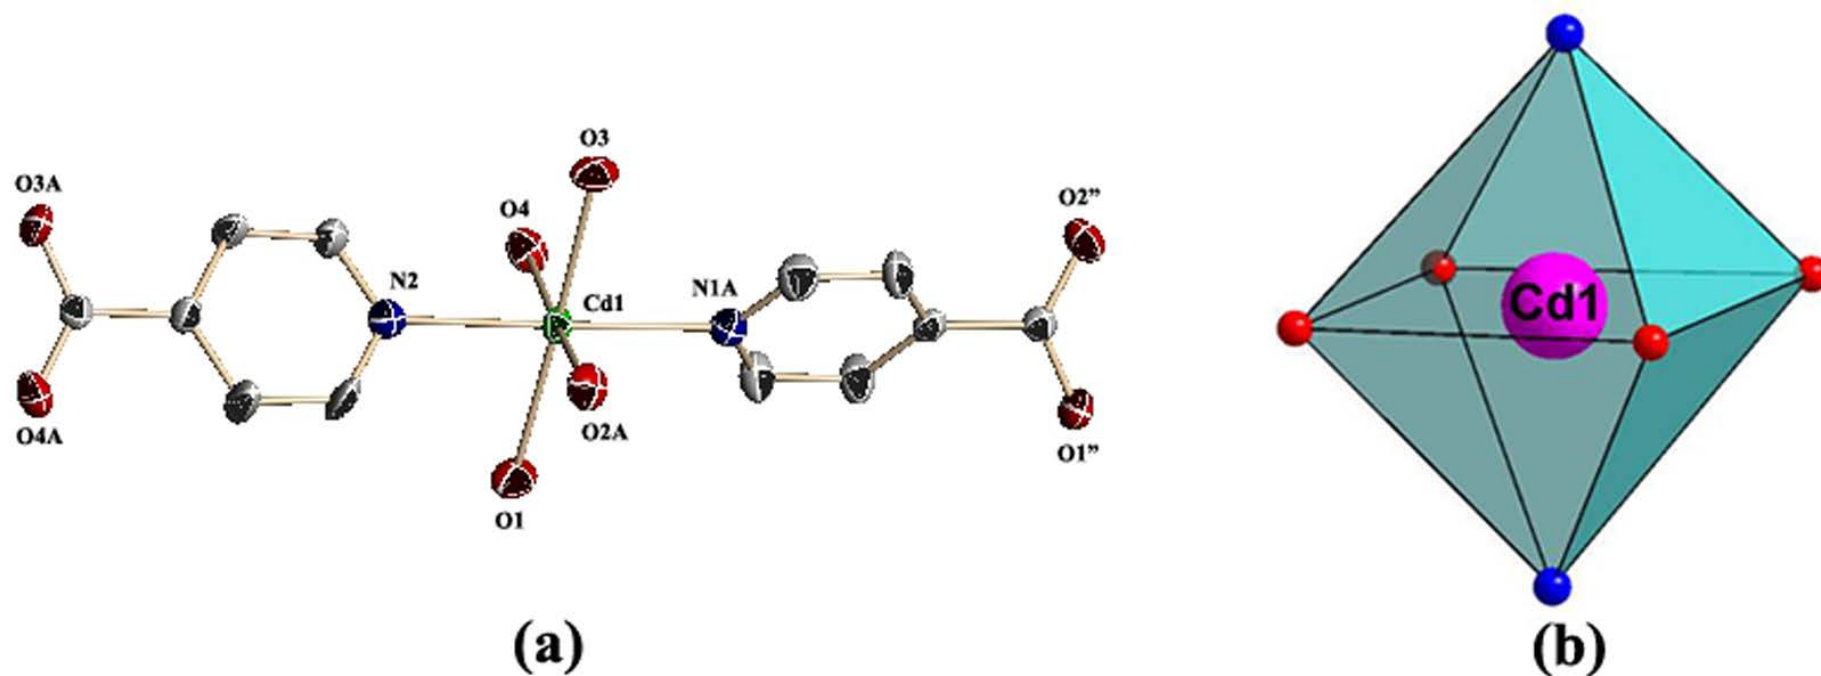

**Figure S2.** (a) The structural unit of **1** with labeling scheme and 50% thermal ellipsoids (water molecules and hydrogen atoms are omitted for clarity). (b) Polyhedral representation of the coordination sphere of the Cd<sup>2+</sup> centre, with display octahedron geometry arrangement in coordination polymer **1**.

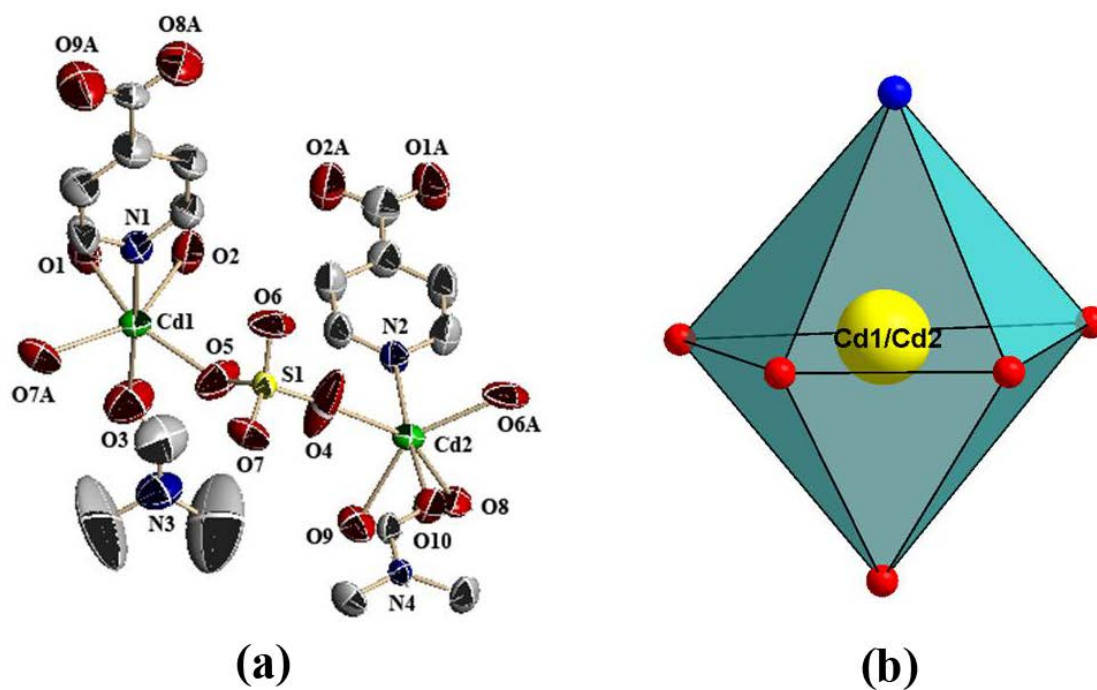

**Figure S3.** (a) The structural unit of **2** with labeling scheme and 50% thermal ellipsoids (hydrogen atoms are omitted for clarity). (b) Polyhedral representation of the coordination sphere of the Cd<sup>2+</sup> centre, with display distorted octahedron geometry arrangement in coordination polymer **2**.

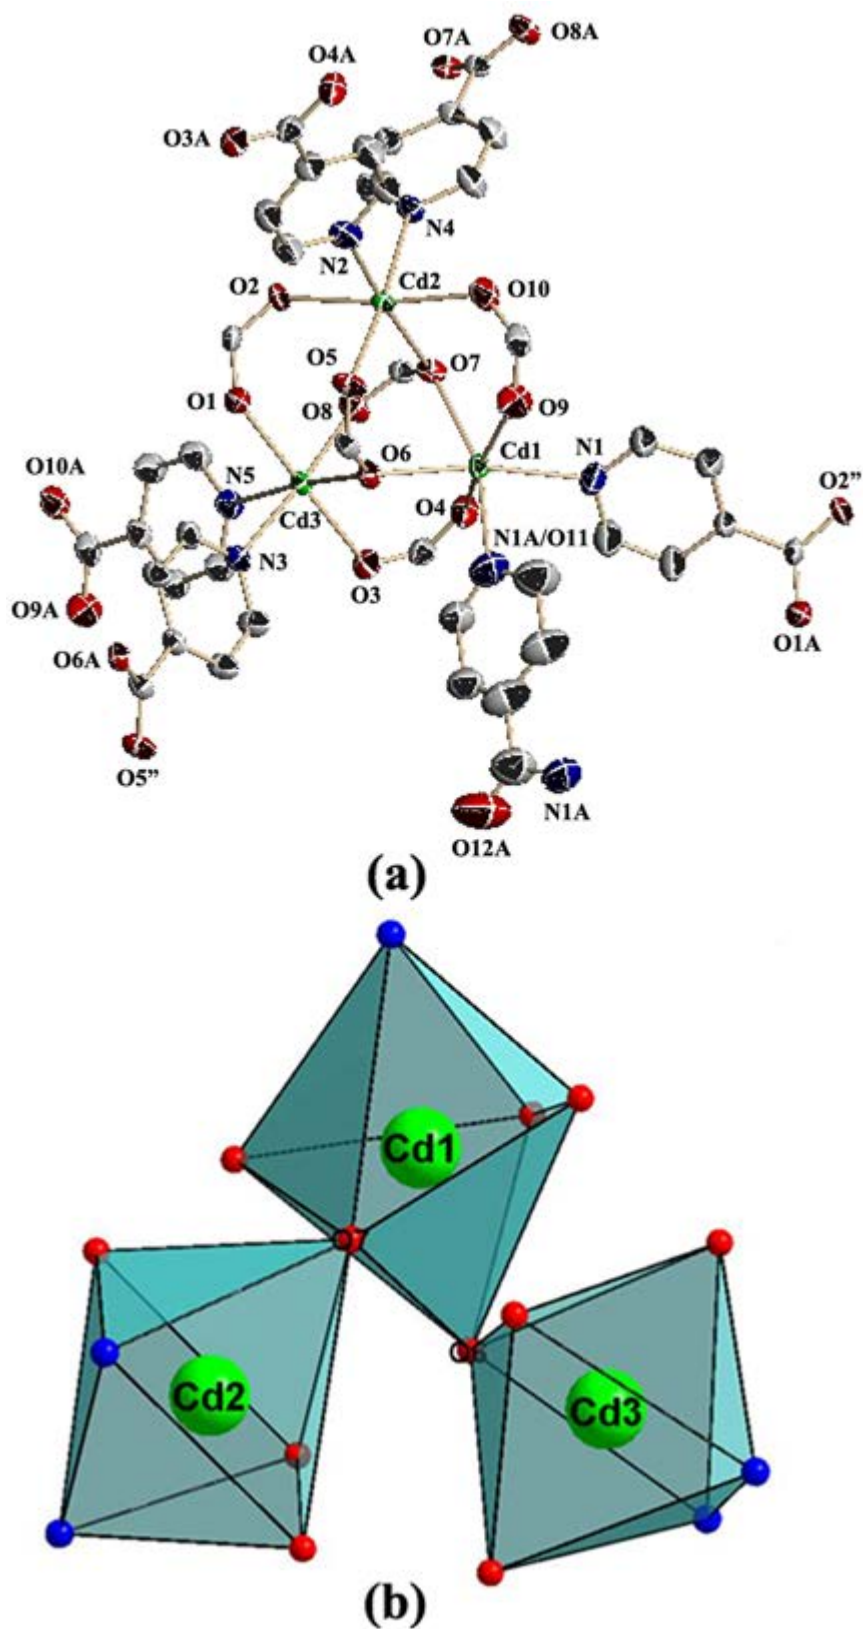

**Figure S4.** (a) The structural unit of **3** with labeling scheme and 50% thermal ellipsoids (water molecules and hydrogen atoms are omitted for clarity). (b) Polyhedral representation of the coordination sphere of the Cd<sup>2+</sup> centre in coordination polymer **3**.

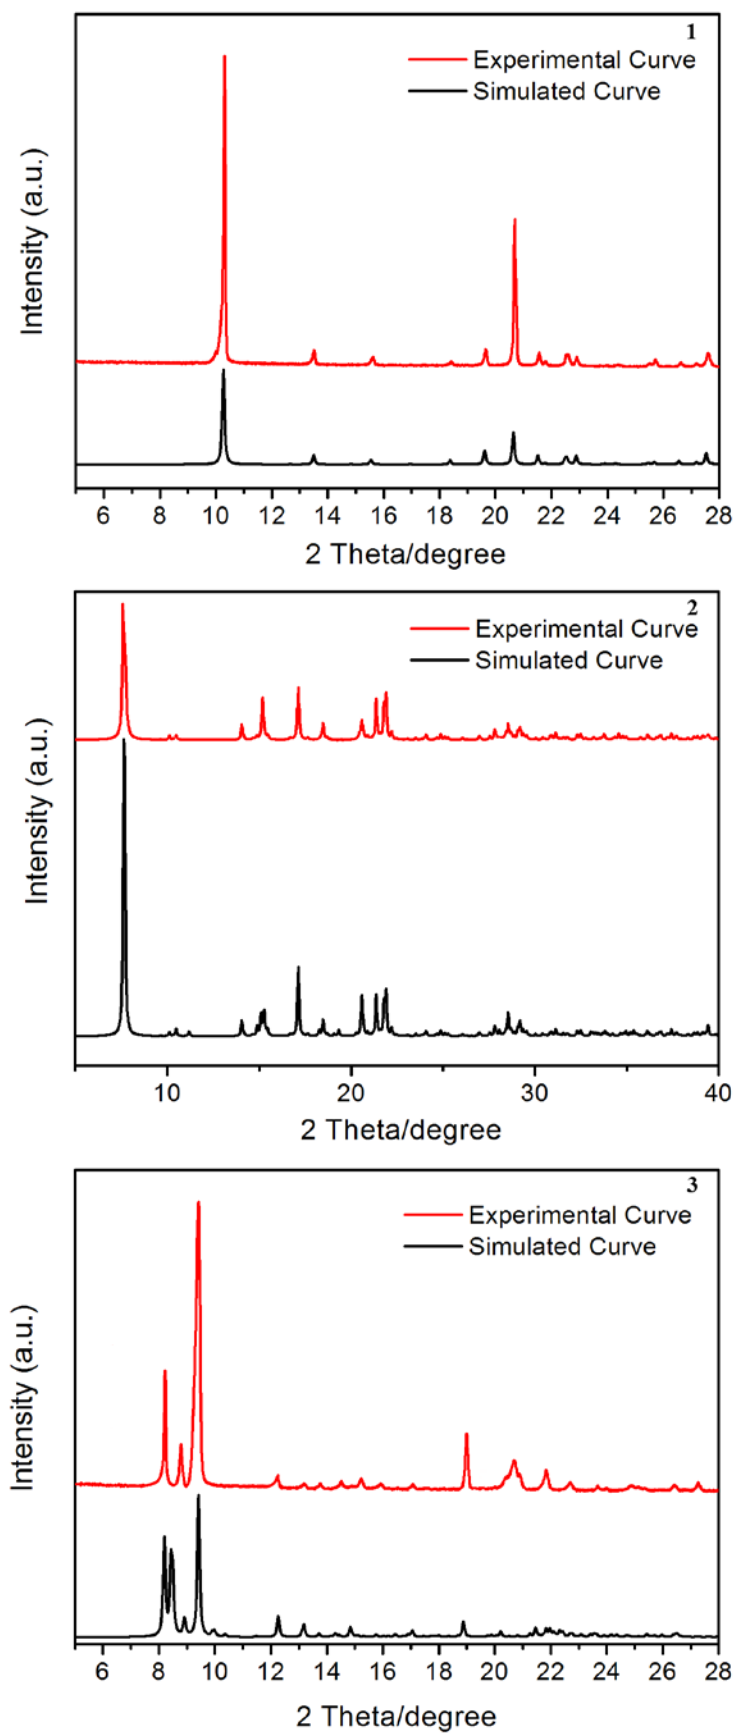

**Figure S5.** The PXR D contrast curves of coordination polymers 1–3.

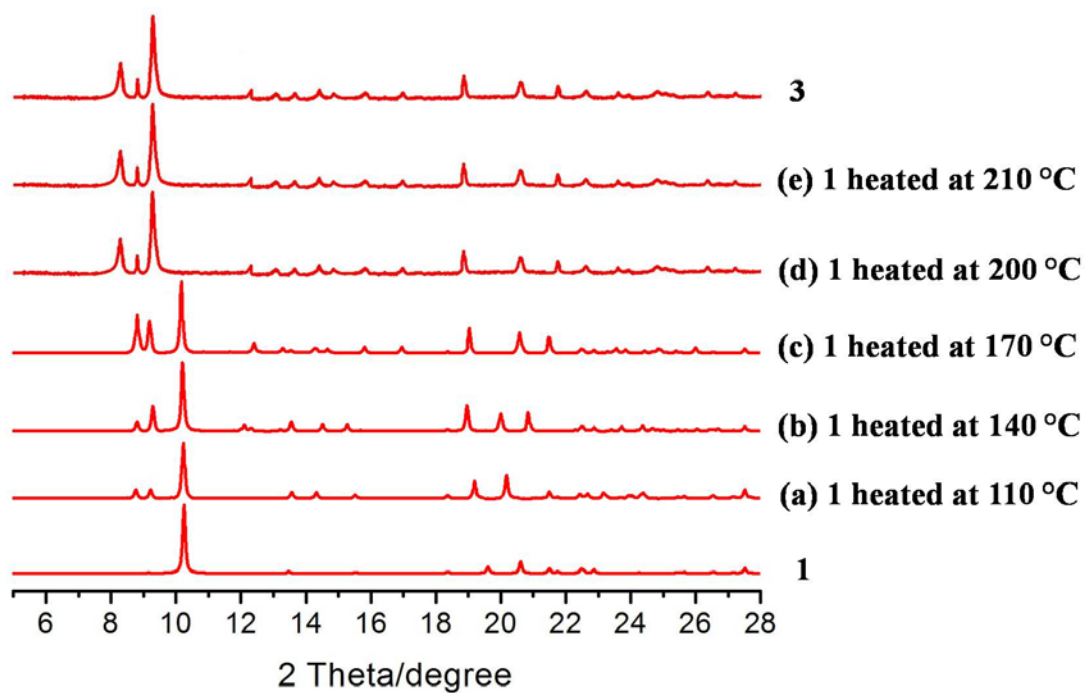

**Figure S6.** The PXRD patterns of **1** at different temperatures: (a) **1** heated at 110 °C, (b) **1** heated at 140 °C, (c) **1** heated at 170 °C, (d) **1** heated at 200 °C, (e) **1** heated at 210 °C.

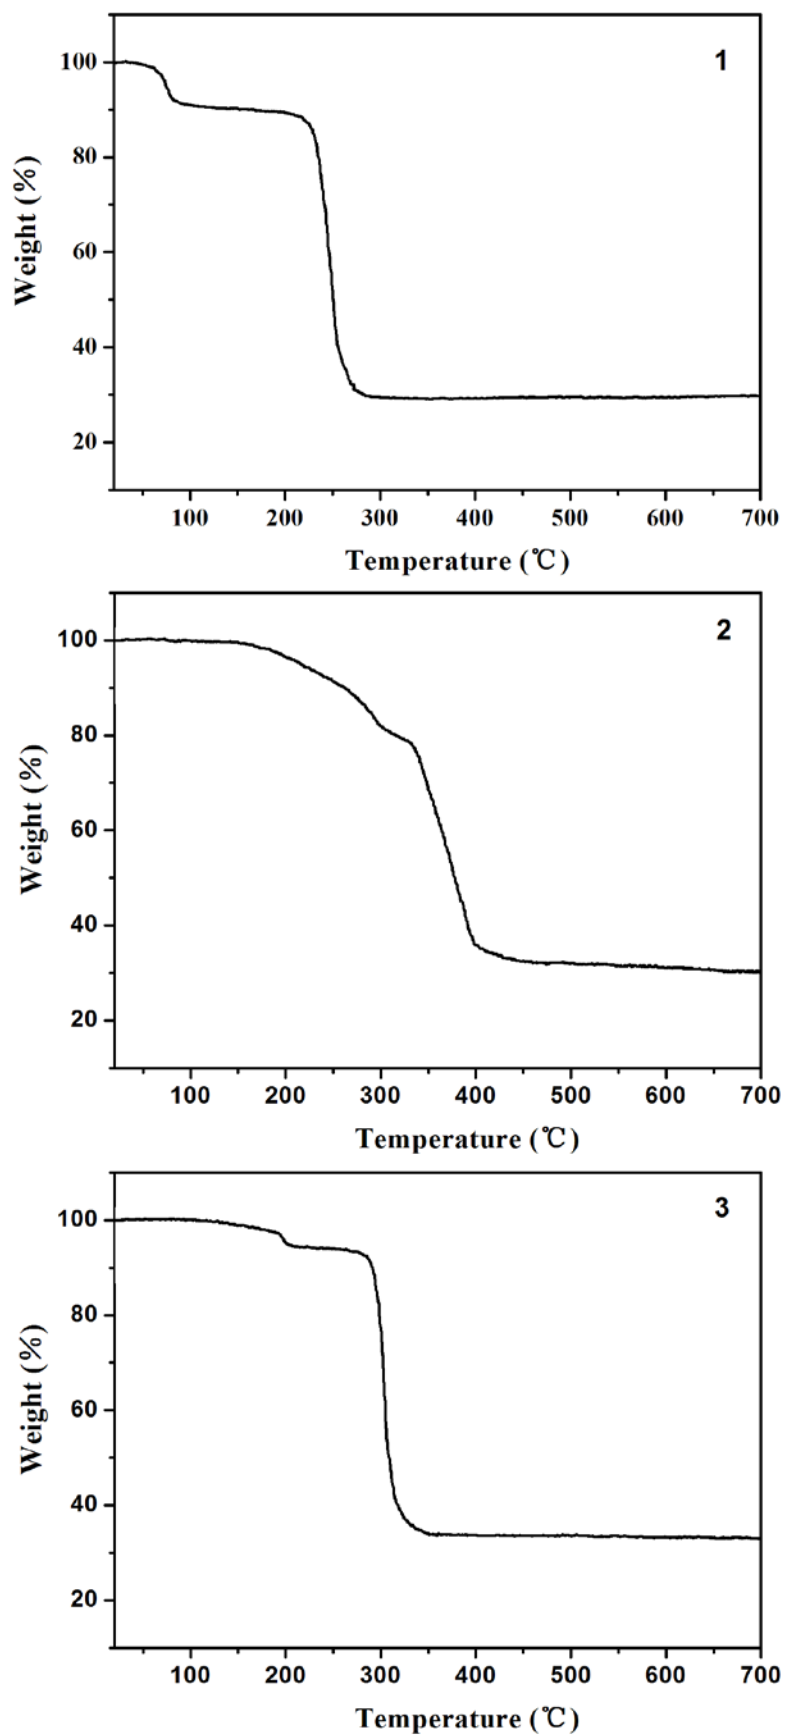

**Figure S7.** The TGA curves of coordination polymers 1–3.



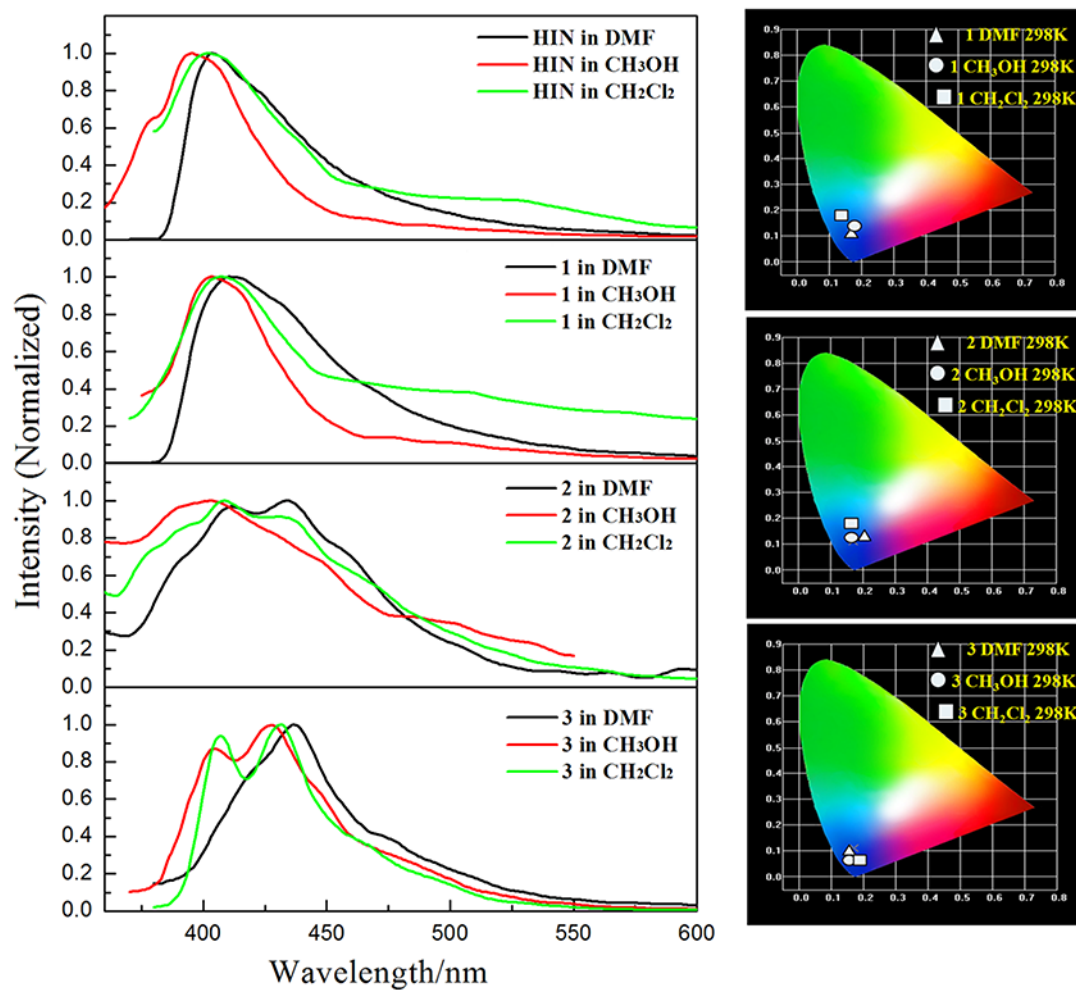

**Figure S8.** Normalized emission spectra of coordination polymers 1–3 and HIN in DMF, CH<sub>3</sub>OH and CH<sub>2</sub>Cl<sub>2</sub> solutions (concentration: (M)  $\approx 10^{-5}$  M) at 298 K and the corresponding color coordinate diagram of emission.

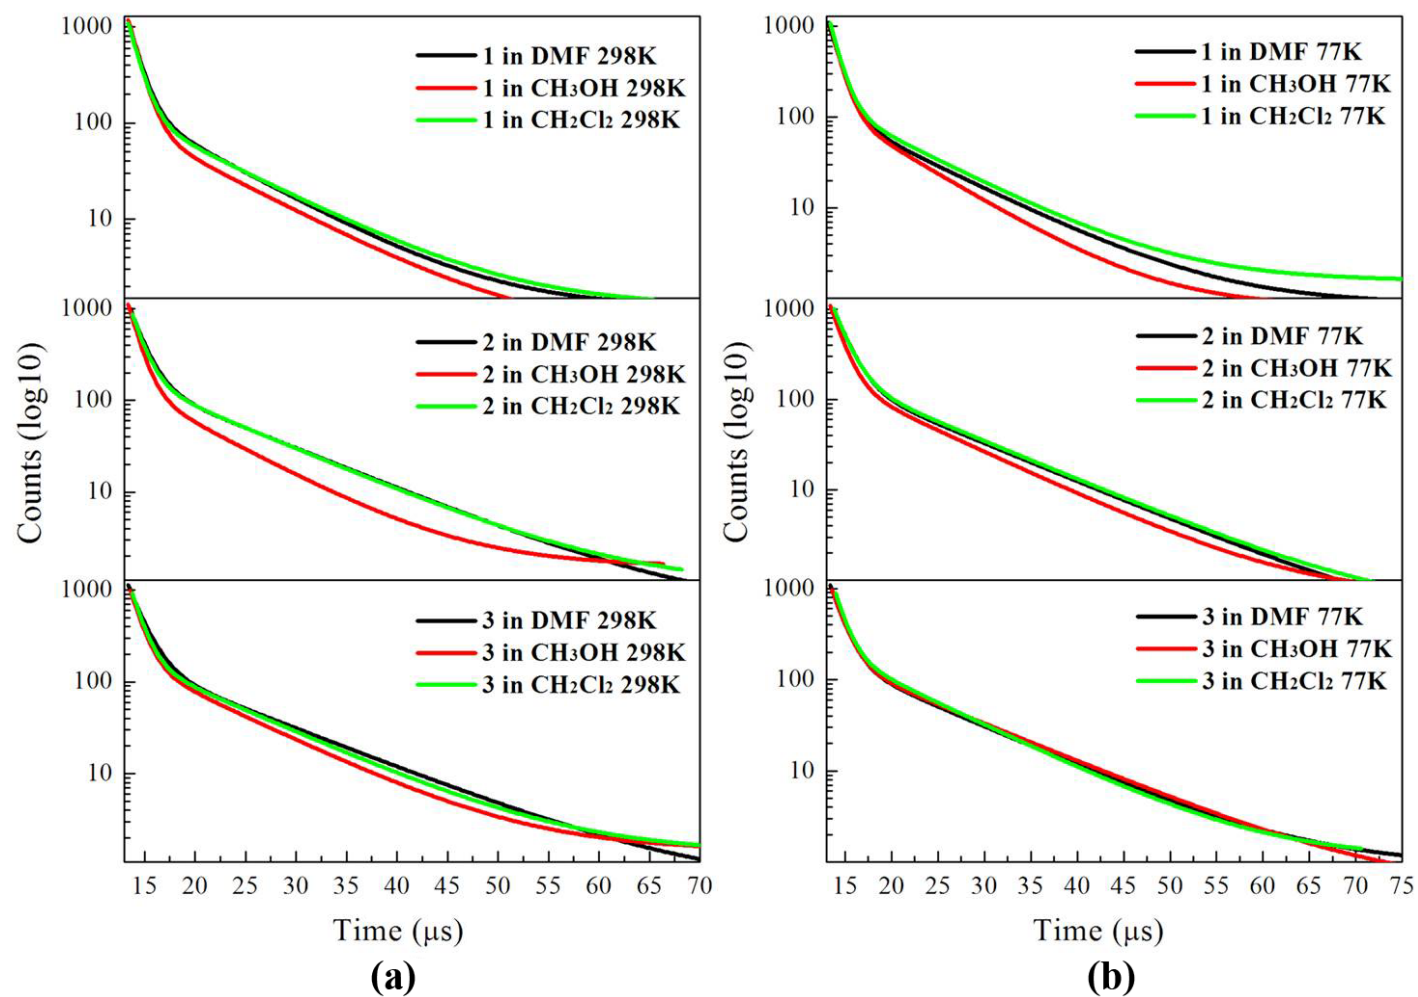

**Figure S9.** The decay curves of coordination polymers **1–3** measured in DMF, CH<sub>3</sub>OH and CH<sub>2</sub>Cl<sub>2</sub> solutions at 298 K (a) and 77 K (b).

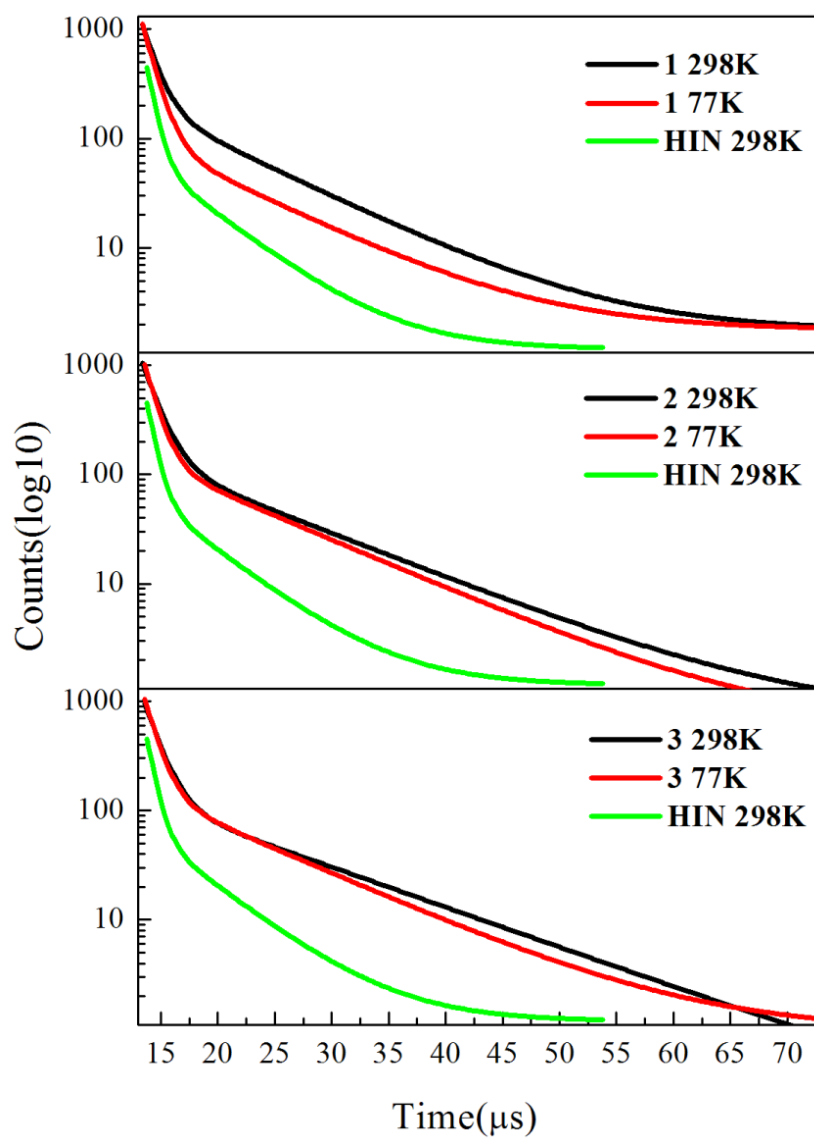

**Figure S10.** The decay curves of coordination polymers **1–3** at 298 K, 77 K and HIN at 298 K in solid state.

**Table S1**

Selected bond distance (Å) and angles (°) in coordination polymer **1**.

| <b>1</b>          |           |                     |           |                    |           |
|-------------------|-----------|---------------------|-----------|--------------------|-----------|
| Cd(1)-O(1)        | 2.290(7)  | Cd(1)-O(3)          | 2.283(7)  | Cd(1)-N(2)         | 2.305(8)  |
| Cd(1)-O(2)#1      | 2.341(7)  | Cd(1)-O(4)          | 2.334(7)  | Cd(1)-N(1)#2       | 2.359(8)  |
| O(1)-C(6)         | 1.251(11) | O(2)-C(6)           | 1.251(11) | O(2)-Cd(1)#1       | 2.341(7)  |
| O(3)-C(12)        | 1.249(11) | O(4)-C(12)#3        | 1.262(11) | N(1)-C(4)          | 1.336(13) |
| N(1)-C(3)         | 1.330(13) | N(1)-Cd(1)#4        | 2.359(8)  | N(2)-C(9)          | 1.319(14) |
| N(2)-C(10)        | 1.318(13) | C(1)-C(5)           | 1.389(14) | C(1)-C(2)          | 1.380(14) |
| C(1)-C(6)         | 1.513(12) | C(2)-C(3)           | 1.379(14) | C(4)-C(5)          | 1.391(14) |
| C(7)-C(8)         | 1.376(14) | C(7)-C(11)          | 1.388(13) | C(7)-C(12)#5       | 1.513(12) |
| C(8)-C(9)         | 1.393(15) | C(10)-C(11)         | 1.389(13) | C(12)-O(4)#3       | 1.262(11) |
| O(1)-Cd(1)-O(3)   | 177.6(3)  | O(1)-Cd(1)-N(2)     | 82.9(3)   | O(1)-Cd(1)-N(1)    | 96.4(3)   |
| O(1)-Cd(1)-O(2)#1 | 96.4(3)   | O(3)-Cd(1)-O(2)#1   | 82.2(3)   | N(2)-Cd(1)-O(2)#1  | 88.7(3)   |
| O(1)-Cd(1)-O(4)   | 88.1(3)   | O(3)-Cd(1)-O(4)     | 93.2(3)   | N(2)-Cd(1)-O(4)    | 90.7(3)   |
| O(2)#1-Cd(1)-O(4) | 175.4(3)  | O(1)-Cd(1)-N(1)#2   | 96.4(3)   | O(3)-Cd(1)-N(1)#2  | 85.8(3)   |
| N(2)-Cd(1)-N(1)#2 | 175.8(3)  | O(2)#1-Cd(1)-N(1)#2 | 95.4(3)   | O(4)-Cd(1)-N(1)#2  | 85.1(3)   |
| C(6)-O(2)-Cd(1)#1 | 129.2(6)  | C(12)-O(3)-Cd(1)    | 137.5(7)  | C(12)#3-O(4)-Cd(1) | 143.3(6)  |
| C(4)-N(1)-C(3)    | 119.1(9)  | C(4)-N(1)-Cd(1)#4   | 120.6(7)  | C(3)-N(1)-Cd(1)#4  | 120.3(7)  |
| C(9)-N(2)-C(10)   | 118.4(9)  | C(9)-N(2)-Cd(1)     | 122.3(7)  | C(10)-N(2)-Cd(1)   | 122.3(7)  |

Symmetry transformations used to generate equivalent atoms:

#1 -x+1,-y+1,-z+1 #2 -x+1,y+1/2,-z+1/2 #3 -x+2,-y+1,-z+1 #4 -x+1,y-1/2,-z+1/2  
 #5 -x+2,y-1/2,-z+3/2

Selected bond distance (Å) and angles (°) in coordination polymer **2**.

| <b>2</b>            |           |                    |           |                    |           |
|---------------------|-----------|--------------------|-----------|--------------------|-----------|
| Cd(1)-O(1)          | 2.309(7)  | Cd(1)-O(3)         | 2.315(8)  | Cd(1)-O(7)         | 2.256(7)  |
| Cd(1)-O(2)          | 2.419(6)  | Cd(1)-O(5)         | 2.204(7)  | Cd(1)-N(1)         | 2.319(6)  |
| Cd(2)-O(4)#2        | 2.190(8)  | Cd(2)-O(6)#3       | 2.275(8)  | Cd(2)-O(8)         | 2.334(7)  |
| Cd(2)-O(9)          | 2.423(7)  | Cd(2)-O(10)        | 2.279(7)  | Cd(2)-N(2)         | 2.307(6)  |
| S(1)-O(4)           | 1.414(8)  | S(1)-O(5)          | 1.453(7)  | S(1)-O(6)          | 1.437(8)  |
| S(1)-O(7)           | 1.445(7)  | O(1)-C(7)          | 1.226(10) | O(2)-C(7)          | 1.250(10) |
| O(3)-C(13)          | 1.080(16) | O(8)-C(1)          | 1.227(12) | O(9)-C(1)          | 1.247(12) |
| O(10)-C(16)         | 1.224(11) | N(1)-C(4)          | 1.323(11) | N(1)-C(5)          | 1.352(11) |
| N(2)-C(12)          | 1.325(10) | N(2)-C(11)         | 1.342(10) | N(3)-C(13)         | 1.324(16) |
| N(3)-C(15)          | 1.43(2)   | N(3)-C(14)         | 1.45(2)   | N(4)-C(16)         | 1.317(12) |
| N(4)-C(18)          | 1.450(12) | N(4)-C(17)         | 1.450(13) | C(1)-C(2)          | 1.524(11) |
| C(2)-C(6)           | 1.379(13) | C(2)-C(3)          | 1.398(12) | C(3)-C(4)          | 1.377(12) |
| C(5)-C(6)           | 1.371(12) | C(7)-C(8)          | 1.501(11) | C(8)-C(9)          | 1.390(11) |
| C(8)-C(10)          | 1.391(12) | C(9)-C(11)#5       | 1.382(11) | C(10)-C(12)#5      | 1.377(12) |
| O(5)#1-Cd(1)-O(7)   | 116.0(3)  | O(5)#1-Cd(1)-O(1)  | 153.6(3)  | O(7)-Cd(1)-O(1)    | 89.0(2)   |
| O(5)#1-Cd(1)-O(3)   | 83.4(3)   | O(7)-Cd(1)-O(3)    | 88.1(3)   | O(1)-Cd(1)-O(3)    | 89.6(3)   |
| O(5)#1-Cd(1)-N(1)   | 97.8(3)   | O(7)-Cd(1)-N(1)    | 88.9(3)   | O(1)-Cd(1)-N(1)    | 90.6(3)   |
| O(3)-Cd(1)-N(1)     | 176.9(3)  | O(5)#1-Cd(1)-O(2)  | 99.9(3)   | O(7)-Cd(1)-O(2)    | 143.6(3)  |
| O(1)-Cd(1)-O(2)     | 54.6(2)   | O(3)-Cd(1)-O(2)    | 90.5(3)   | N(1)-Cd(1)-O(2)    | 92.1(3)   |
| O(4)#2-Cd(2)-O(6)#3 | 119.7(5)  | O(4)#2-Cd(2)-O(10) | 89.5(3)   | O(6)#3-Cd(2)-O(10) | 84.2(3)   |
| O(4)#2-Cd(2)-N(2)   | 89.2(3)   | O(6)#3-Cd(2)-N(2)  | 89.8(3)   | O(10)-Cd(2)-N(2)   | 172.2(3)  |
| O(4)#2-Cd(2)-O(8)   | 149.9(5)  | O(6)#3-Cd(2)-O(8)  | 90.4(3)   | O(10)-Cd(2)-O(8)   | 94.5(3)   |
| N(2)-Cd(2)-O(8)     | 90.5(3)   | O(4)#2-Cd(2)-O(9)  | 95.9(5)   | O(6)#3-Cd(2)-O(9)  | 143.4(3)  |
| O(10)-Cd(2)-O(9)    | 88.2(3)   | N(2)-Cd(2)-O(9)    | 99.5(3)   | O(8)-Cd(2)-O(9)    | 54.5(2)   |
| O(4)-S(1)-O(6)      | 108.8(8)  | O(4)-S(1)-O(7)     | 104.7(6)  | O(6)-S(1)-O(7)     | 110.5(6)  |
| O(4)-S(1)-O(5)      | 110.0(7)  | O(6)-S(1)-O(5)     | 109.9(4)  | O(7)-S(1)-O(5)     | 112.8(5)  |

Symmetry transformations used to generate equivalent atoms:

#1 -x+1,-y+1,-z #2 -x+1,-y+1,-z+1 #3 x-1,y,z+1 #4 x+1,y,z-1 #5 -x,-y+2,-z+1

Selected bond distance (Å) and angles (°) in coordination polymer **3**.

| <b>3</b>         |           |                  |          |                  |          |
|------------------|-----------|------------------|----------|------------------|----------|
| Cd(1)-O(9)       | 2.220(3)  | Cd(1)-O(4)       | 2.265(3) | Cd(1)-O(11)      | 2.297(4) |
| Cd(1)-O(6)       | 2.335(3)  | Cd(1)-O(7)       | 2.401(2) | Cd(1)-N(1)       | 2.376(4) |
| Cd(2)-O(10)      | 2.240(3)  | Cd(2)-O(2)       | 2.258(2) | Cd(2)-O(5)       | 2.269(2) |
| Cd(2)-O(7)       | 2.402(3)  | Cd(2)-N(2)       | 2.353(3) | Cd(2)-N(4)       | 2.347(3) |
| Cd(3)-O(1)       | 2.241(3)  | Cd(3)-O(3)       | 2.246(3) | Cd(3)-O(8)       | 2.272(2) |
| Cd(3)-O(6)       | 2.404(2)  | Cd(3)-N(3)       | 2.337(3) | Cd(3)-N(5)       | 2.357(3) |
| O(8)-C(19)       | 1.237(4)  | O(6)-C(13)       | 1.264(5) | O(7)-C(19)       | 1.284(4) |
| O(3)-C(7)        | 1.236(5)  | O(5)-C(13)       | 1.243(5) | O(1)-C(1)        | 1.254(5) |
| O(2)-C(1)        | 1.261(4)  | O(10)-C(25)      | 1.243(5) | N(4)-C(23)       | 1.344(5) |
| N(4)-C(24)       | 1.341(4)  | O(4)-C(7)        | 1.250(4) | N(5)-C(29)       | 1.337(5) |
| N(5)-C(27)       | 1.334(5)  | N(3)-C(17)       | 1.339(5) | N(3)-C(18)       | 1.338(5) |
| C(16)-C(17)#1    | 1.379(5)  | C(21)-C(24)#2    | 1.380(5) | C(26)-C(28)#3    | 1.383(6) |
| O(9)-Cd(1)-O(4)  | 162.0(12) | O(9)-Cd(1)-O(11) | 100.5(4) | O(4)-Cd(1)-O(11) | 92.3(4)  |
| O(9)-Cd(1)-O(6)  | 95.5(3)   | O(4)-Cd(1)-O(6)  | 98.6(10) | O(11)-Cd(1)-O(6) | 83.1(4)  |
| O(9)-Cd(1)-N(1)  | 86.6(4)   | O(4)-Cd(1)-N(1)  | 81.6(3)  | O(11)-Cd(1)-N(1) | 86.0(4)  |
| O(6)-Cd(1)-N(1)  | 169.1(3)  | O(9)-Cd(1)-O(7)  | 89.5(3)  | O(4)-Cd(1)-O(7)  | 82.0(3)  |
| O(11)-Cd(1)-O(7) | 161.3(4)  | O(6)-Cd(1)-O(7)  | 80.2(2)  | N(1)-Cd(1)-O(7)  | 110.5(3) |
| O(10)-Cd(2)-O(2) | 172.7(3)  | O(10)-Cd(2)-O(5) | 94.2(3)  | O(2)-Cd(2)-O(5)  | 90.5(3)  |
| O(10)-Cd(2)-N(4) | 87.2(3)   | O(2)-Cd(2)-N(4)  | 87.5(3)  | O(5)-Cd(2)-N(4)  | 173.4(2) |
| O(1)-Cd(3)-O(3)  | 178.5(3)  | O(1)-Cd(3)-O(8)  | 88.8(3)  | O(3)-Cd(3)-O(8)  | 89.5(3)  |
| O(8)-Cd(3)-N(3)  | 174.7(3)  | O(3)-Cd(3)-N(5)  | 86.7(3)  | N(5)-Cd(3)-O(6)  | 173.0(3) |

Symmetry transformations used to generate equivalent atoms:

#1 -x+1,-y+1,-z+1      #2 -x+1,-y+1,-z      #3 x+1,y+1,z
